# Supplementary material for: Possible mechanism for d0 ferromagnetism mediated by intrinsic defects
Source: Royal Society of Chemistry journal article supplement (doi:10.1039/c4ra06237j), 2014-01-01

Fig. S1 (a) density of states of a neutral  $V_{Zn}$  in the ZnS nanoparticle model calculated by PBE functional, showing the fermi level  $E_F$  pinning at around 1/3 of the defect spin down states; (b) spin density map (isosurface value =  $3 \times 10^{-3} e/\text{\AA}^3$ ) of the corresponding  $V_{Zn}$  calculated by PBE functional. The pink, blue and purple balls represent the pseudohydrogen, S and Zn atoms, respectively.

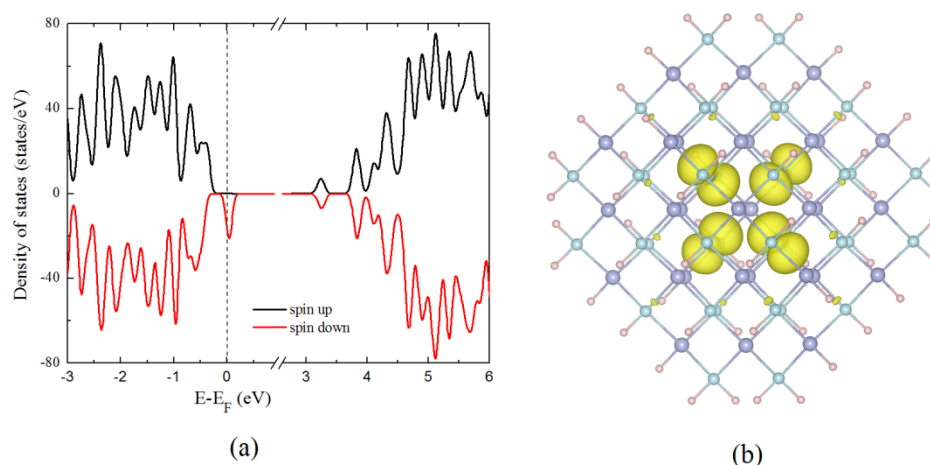

Fig. S2 Spin density distribution ( $8 \times 10^{-3} e/\text{\AA}^3$ ) of  $V_{Zn}^0$  in a 64-atom ZnS supercell calculated by HSE06 with an amount of the Hartree-Fock exchange (a)  $\alpha = 0.25$  and (b)  $\alpha = 0.35$ . The defect structure was relaxed with  $\alpha = 0.25$  by default. The small and large balls represent S and Zn atoms.

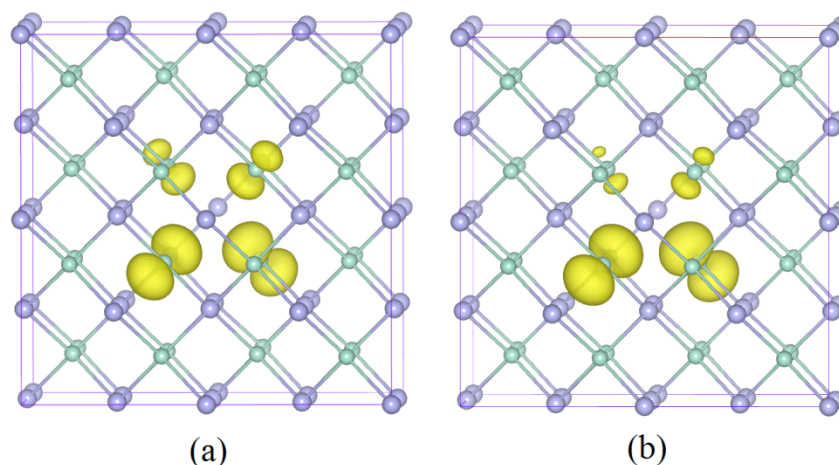

Supplement: c4ra06237j1.pdf [file c4ra06237j1.pdf]
